# Supplementary material
Source: ML conference proceedings conference paper supplement (https://proceedings.neurips.cc/paper_files/paper/2009/hash/00411460f7c92d2124a67ea0f4cb5f85-Abstract.html)
Supplement: Supplementary file 2 [file 00411460f7c92d2124a67ea0f4cb5f85-Supplemental.zip]

---

# Monte Carlo Sampling for Regret Minimization in Extensive Games

---

**Marc Lanctot**

Department of Computing Science  
University of Alberta  
Edmonton, Alberta, Canada T6G 2E8  
lanctot@ualberta.ca

**Kevin Waugh**

School of Computer Science  
Carnegie Mellon University  
Pittsburgh PA 15213-3891  
waugh@cs.cmu.edu

**Martin Zinkevich**

Yahoo! Research  
Santa Clara, CA, USA 95054  
maz@yahoo-inc.com

**Michael Bowling**

Department of Computing Science  
University of Alberta  
Edmonton, Alberta, Canada T6G 2E8  
bowling@cs.ualberta.ca

The purpose of this errata is to correct some errors in the authors' original paper. The paper was divided into the **main paper** and **appendix**. The paper PDFs linked from the authors' web sites have been updated. The associated technical report has also been updated.

## Corrections to the main paper

Equation 11 from the original paper should read:

$$\sum_{z \in Q \cap Z_I} u_i(z) (\pi_i^\sigma(z[I]a, z) - \pi_i^\sigma(z[I], z))$$

## Corrections to the appendix

- There should be no summation in Equation 8.
- In Equation 10, there is an extra  $a$  in expression for  $\pi_{-i}^\sigma$ . This can be equal to 0 when  $z[I]a$  is not a prefix of  $z[I]$ . The correction is to multiply by

$$\frac{\pi_{-i}^\sigma(z[I], z)}{\pi_{-i}^\sigma(z[I]a, z)}$$

instead of

$$\frac{\pi_{-i}^\sigma(z[I]a, z)}{\pi_{-i}^\sigma(z[I]a, z)}.$$

- The original Equations 11-16 do not follow from Equation 10 when  $z[I]a$  was not a prefix of  $z[I]$ .
