# Supplementary material
Source: ML conference proceedings conference paper supplement (https://proceedings.neurips.cc/paper_files/paper/2009/hash/00411460f7c92d2124a67ea0f4cb5f85-Abstract.html)
Supplement: Supplementary file 5 [file 00411460f7c92d2124a67ea0f4cb5f85-Supplemental.zip]

Archive with 8 entries (5 files):
- extra 3/
- extra 3/NIPS2009_0363_correction.pdf
- __MACOSX/
- __MACOSX/extra 3/
- __MACOSX/extra 3/._NIPS2009_0363_correction.pdf
- extra 3/NIPS2009_0363_extra.pdf
- __MACOSX/extra 3/._NIPS2009_0363_extra.pdf
- __MACOSX/._extra 3
